# Supplementary material for: Immunoglobulin G glycome composition in transition from premenopause to postmenopause
Source: PubMed Central journal article supplement (PMC8881712; doi:10.1016/j.isci.2022.103897), 2022-02-10
Supplement: mmc1.pdf [file mmc1.pdf]

**Supplemental information**

**Immunoglobulin G glycome composition  
in transition from premenopause to postmenopause**

**Helena Deriš, Domagoj Kifer, Ana Cindrić, Tea Petrović, Ana Cvetko, Irena Trbojević-Akmačić, Ivana Kolčić, Ozren Polšek, Louise Newson, Tim Spector, Cristina Menni, and Gordan Lauc**

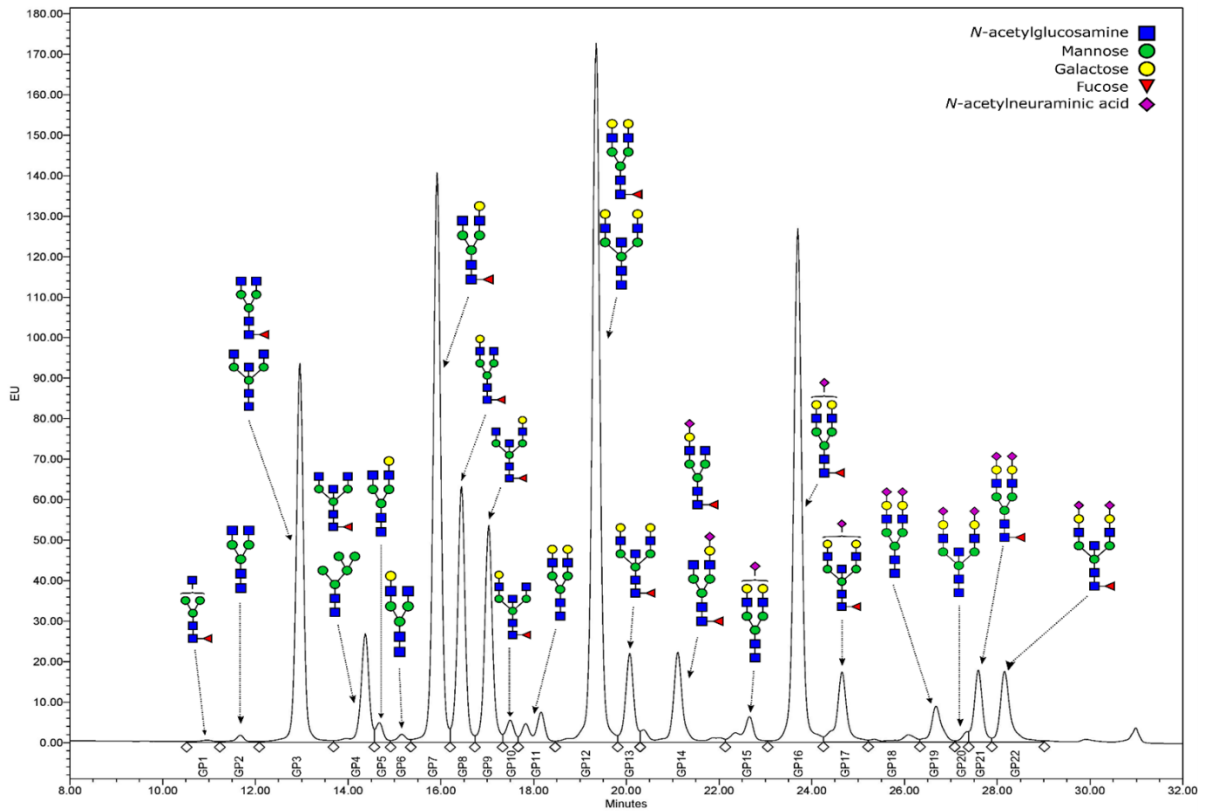

**Figure S1. Representative HILIC-UPLC-FLR chromatographic profile of the immunoglobulin G RapiFluor-MS labeled N-glycome.** Related to Figure 1 and Figure 2.

Graphic representation of the glycan structures corresponding to each glycan peak (GP). In the case of multiple structures per GP, the upper structure is the major one, and the lower one is minor in abundance. EU = emission units.

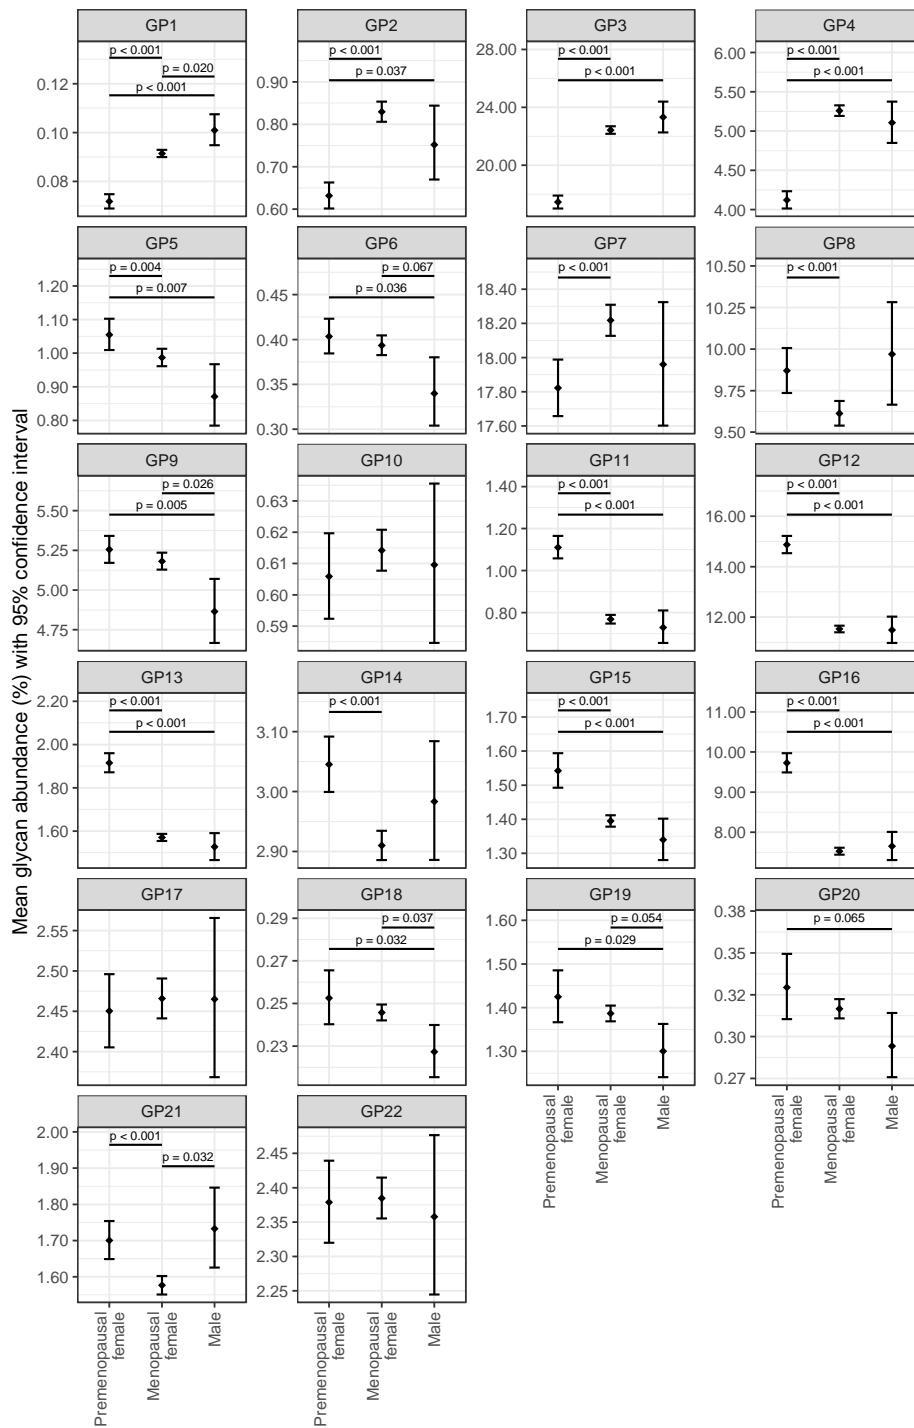

**Figure S2. IgG glycome composition in premenopausal and postmenopausal women, and men.** Related to Figure 1.

Mean glycan abundances (% of total IgG N-glycome) and corresponding 95% confidence intervals were estimated from the fitted mixed model with logit transformed glycan as dependent variable and sex, menopausal status (nested within sex), age and age-menopausal status interaction as fixed factors, as well as family ID and individual ID (nested within family ID) as random intercepts and age as random slope. Only adjusted post-hoc p values less than 0.1 are shown.

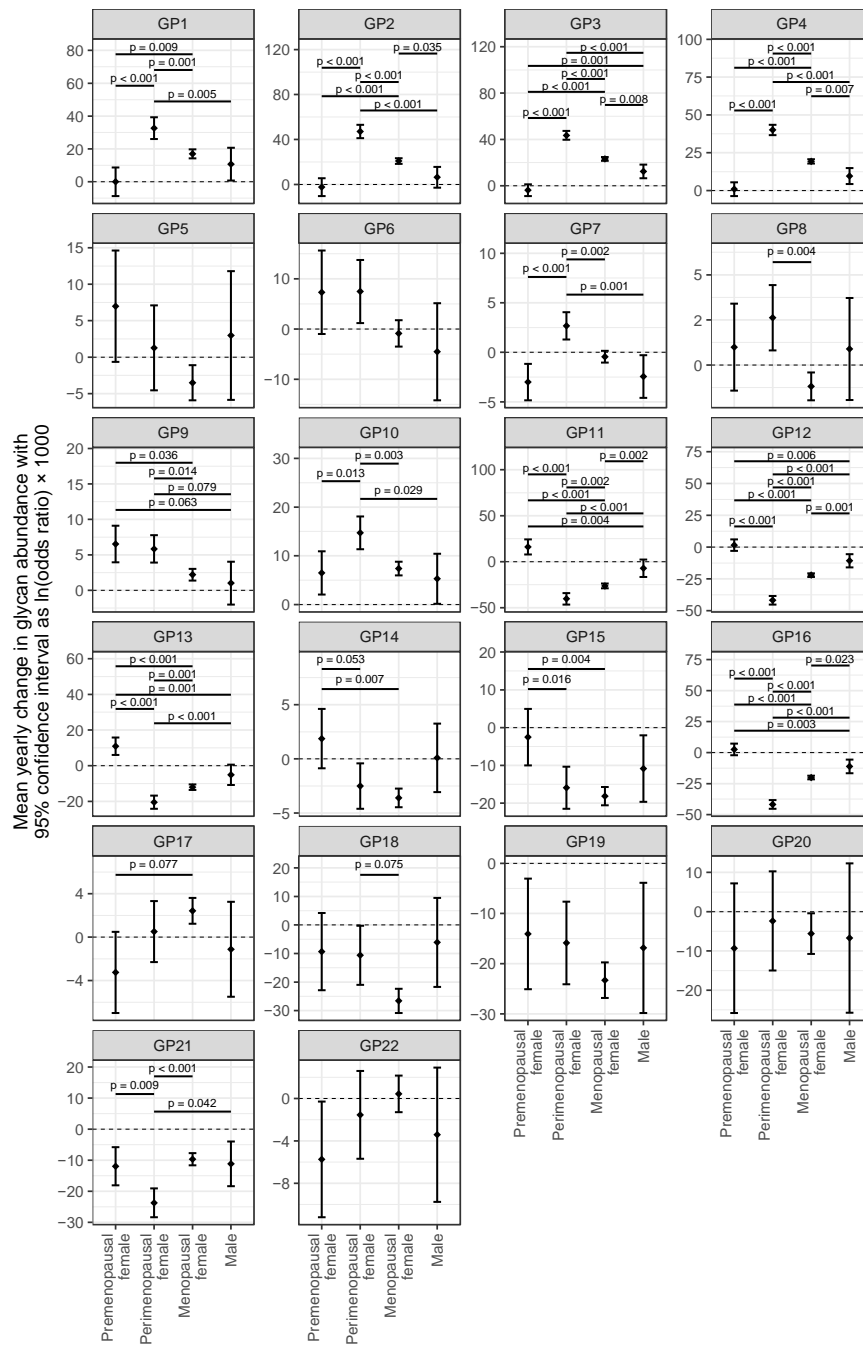

**Figure S3. Average annual change of IgG glycans in females during the perimenopause period, females in pre- or postmenopause, and males.** Related to Figure 2.

Mean yearly change in glycan abundances and corresponding 95% confidence intervals were estimated from the fitted mixed model with logit transformed glycan as dependent variable and sex, menopausal status (nested within sex), age and age-menopausal status interaction as fixed factors, as well as family ID and individual ID (nested within family ID) as random intercepts and age as random slope. Only adjusted post-hoc p values less than 0.1 are shown.

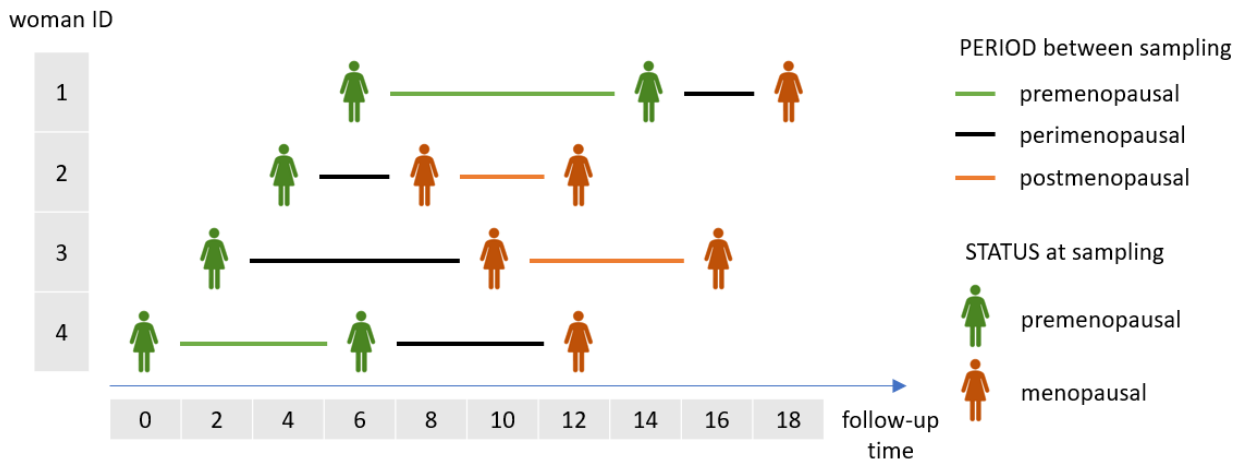

**Figure S4. Diagram indicating which time points were used in calculating the yearly rate of change in IgG-N-glycome composition.** Related to Figure 2. The x-scale is expressed in years.

**Table S1. Descriptive information about the cohort.** Related to Figure 1 and Figure 2.

|                                           | <i>Samples</i> | <i>Individuals</i> | <i>Families</i> |
|-------------------------------------------|----------------|--------------------|-----------------|
| <b>Count, N</b>                           | 5354           | 2053               | 1173            |
| - <i>by sex (%)</i>                       |                |                    |                 |
| Male                                      | 274 (5)        | 113 (6)            | 69 (6)          |
| Female                                    | 5080 (95)      | 1940 (94)          | 1104 (94)       |
| - <i>by group (%)</i>                     |                |                    |                 |
| Pre-menopause                             | 1087 (21)      | 732                | 500             |
| Menopause                                 | 3993 (79)      | 1678               | 969             |
| <b>- by age subset (%)</b>                |                |                    |                 |
| Between 45 and 55 years                   | 1374 (26)      | 1065 (52)          | 670 (57)        |
| - <i>by sex (%)</i>                       |                |                    |                 |
| Male                                      | 87 (6)         | 59 (6)             | 39 (6)          |
| Female                                    | 1287 (94)      | 1006 (94)          | 631 (94)        |
| - <i>by group (%)</i>                     |                |                    |                 |
| Pre-menopause                             | 507 (39)       | 453                | 340             |
| Menopause                                 | 780 (61)       | 662                | 458             |
| <b>- by number of samples (%)</b>         |                |                    |                 |
| One                                       |                | 203 (10)           |                 |
| Two                                       |                | 399 (19)           |                 |
| Three                                     |                | 1451 (71)          |                 |
| <b>Age in years, mean (SD)</b>            | 58.3 (11.3)    | 57.6 (10.3)        | 57.2 (10.3)     |
| - <i>by sex</i>                           |                |                    |                 |
| Male                                      | 57.9 (11.7)    | 57.4 (10.8)        | 57.4 (10.9)     |
| Female                                    | 58.3 (11.2)    | 57.6 (10.3)        | 57.2 (10.3)     |
| - <i>by group</i>                         |                |                    |                 |
| Pre-menopause                             | 43.1 (7.1)     | 44.0 (6.0)         | 44.6 (5.9)      |
| Menopause                                 | 62.4 (8.2)     | 61.7 (6.6)         | 61.3 (6.7)      |
| <b>- by age subset</b>                    |                |                    |                 |
| Between 45 and 55 years                   | 50.6 (3.1)     | 50.7 (2.6)         | 50.6 (2.6)      |
| - <i>by sex</i>                           |                |                    |                 |
| Male                                      | 50.5 (3.1)     | 50.6 (2.6)         | 50.6 (2.5)      |
| Female                                    | 50.6 (3.1)     | 50.7 (2.6)         | 50.6 (2.6)      |
| - <i>by group</i>                         |                |                    |                 |
| Pre-menopause                             | 48.5 (2.6)     | 48.5 (2.4)         | 48.7 (2.4)      |
| Menopause                                 | 51.9 (2.7)     | 52.2 (2.3)         | 52.0 (2.2)      |
| <b>Follow up time in years, mean (SD)</b> |                |                    |                 |
| <b>between consecutive samples</b>        |                | 6.94 (2.58)        |                 |
| - <i>by sex</i>                           |                |                    |                 |
| Male                                      |                | 7.17 (2.94)        |                 |
| Female                                    |                | 6.93 (2.56)        |                 |
| <b>total follow up time</b>               |                | 12.2 (4.3)         |                 |
| - <i>by sex</i>                           |                |                    |                 |
| Male                                      |                | 12.1 (4.8)         |                 |
| Female                                    |                | 12.2 (4.3)         |                 |

**Table S2. A detailed description of glycan structures.** Related to Figure 1 and Figure 2. Glycan structures, corresponding to every individual immunoglobulin RapiFluor-MS labelled glycan peak, were assigned as described in Keser et al. (Keser et al., 2018).\*

| <i>RapiFluor-MS glycan peak</i> | <i>Glycan structure</i>   | <i>Description</i>                                                                                                                             | <i>Formula</i> |
|---------------------------------|---------------------------|------------------------------------------------------------------------------------------------------------------------------------------------|----------------|
| GP1                             | FA1                       | core fucosylated, monoantennary                                                                                                                | GP1 / GP       |
| GP2                             | A2                        | agalactosylated, biantennary                                                                                                                   | GP2 / GP       |
| GP3                             | FA2;<br>A2B               | core fucosylated, biantennary (major);<br>biantennary with bisecting GlcNAc (minor)                                                            | GP3 / GP       |
| GP4                             | FA2B;<br>M5               | core fucosylated, biantennary with bisecting GlcNAc<br>(major); oligomannose (minor)                                                           | GP4 / GP       |
| GP5                             | A2[6]G1                   | monogalactosylated, biantennary                                                                                                                | GP5 / GP       |
| GP6                             | A2[3]G1                   | monogalactosylated, biantennary                                                                                                                | GP6 / GP       |
| GP7                             | FA2[6]G1                  | core fucosylated and monogalactosylated, biantennary                                                                                           | GP7 / GP       |
| GP8                             | FA2[3]G1                  | core fucosylated and monogalactosylated, biantennary                                                                                           | GP8 / GP       |
| GP9                             | FA2[6]BG1                 | core fucosylated and monogalactosylated, biantennary<br>with bisecting GlcNAc                                                                  | GP9 / GP       |
| GP10                            | FA2[3]BG1                 | core fucosylated and monogalactosylated, biantennary<br>with bisecting GlcNAc                                                                  | GP10 / GP      |
| GP11                            | A2G2                      | digalactosylated, biantennary                                                                                                                  | GP11 / GP      |
| GP12                            | FA2G2;<br>A2BG2           | core fucosylated, digalactosylated, biantennary (major);<br>digalactosylated, biantennary with bisecting GlcNAc (minor)                        | GP12 / GP      |
| GP13                            | FA2BG2                    | core fucosylated, digalactosylated, biantennary with<br>bisecting GlcNAc                                                                       | GP13 / GP      |
| GP14                            | FA2[6]G1S1;<br>FA2[3]G1S1 | core fucosylated, monogalactosylated and monosialylated<br>biantennary; core fucosylated, monogalactosylated and<br>monosialylated biantennary | GP14 / GP      |
| GP15                            | A2G2S1                    | digalactosylated and monosialylated biantennary                                                                                                | GP15 / GP      |
| GP16                            | FA2G2S1                   | core fucosylated, digalactosylated and monosialylated<br>biantennary                                                                           | GP16 / GP      |
| GP17                            | FA2BG2S1                  | core fucosylated, digalactosylated and monosialylated<br>biantennary with bisecting GlcNAc                                                     | GP17 / GP      |
| GP18                            | n.d.                      | structure not determined                                                                                                                       | GP18 / GP      |
| GP19                            | A2G2S2                    | digalactosylated and disialylated biantennary                                                                                                  | GP19 / GP      |
| GP20                            | A2BG2S2                   | digalactosylated and disialylated biantennary with bisecting<br>GlcNAc                                                                         | GP20 / GP      |
| GP21                            | FA2G2S2                   | core fucosylated, digalactosylated and disialylated<br>biantennary                                                                             | GP21 / GP      |
| GP22                            | FA2BG2S2                  | core fucosylated, digalactosylated and disialylated<br>biantennary with bisecting GlcNAc                                                       | GP22 / GP      |

\*structure abbreviations – all N-glycans have two core *N*-acetylglucosamines (GlcNAcs); F at the start of the abbreviation indicates a core-fucose  $\alpha$ 1,6-linked to the inner GlcNAc; M<sub>x</sub>, number (x) of mannose on core GlcNAcs; A<sub>x</sub>, number of antenna (GlcNAc) on trimannosyl core; A2, biantennary with both GlcNAcs as  $\beta$ 1,2-linked; B, bisecting GlcNAc linked  $\beta$ 1,4 to  $\beta$ 1,3 mannose; G(x), number (x) of  $\beta$ 1,4 linked galactose on antenna; S(x), number (x) of sialic acids linked to galactose.

**Table S3. Formulas used for the calculation of IgG derived traits.** Related to Figure 1, Figure 2 and Figure 4.

| <b><i>Structural feature</i></b>  | <b><i>Formula</i></b>                                               |
|-----------------------------------|---------------------------------------------------------------------|
| Agalactosylation (G0)             | GP1+GP2+GP3+GP4                                                     |
| Monogalactosylation (G1)          | GP5+GP6+GP7+GP8+GP9                                                 |
| Digalactosylation (G2)            | GP10+GP11+GP12+GP13                                                 |
| Monosialylation (S1)              | GP14+GP15+GP16+GP17                                                 |
| Disialylation (S2)                | GP19+GP20+GP21+GP22                                                 |
| Incidence of bisecting GlcNAc (B) | GP4+GP9+GP10+GP13+GP17+GP20+GP22                                    |
| Core fucosylation (CF)            | GP1+GP3+GP4+GP7+GP8+GP9+GP10+GP12+GP13+GP14+<br>GP16+GP17+GP21+GP22 |



**Table S4. Descriptive information about validation cohorts.** Related to Figure 4.

| <b><i>Cohort</i></b> | <b><i>Premenopausal women</i></b> | <b><i>Menopausal women</i></b> |
|----------------------|-----------------------------------|--------------------------------|
| Vis                  |                                   |                                |
| N (%)                | 62 (47)                           | 70 (53)                        |
| Age, mean (SD)       | 48.4 (2.9)                        | 51.1 (3.3)                     |
| Korcula              |                                   |                                |
| N (%)                | 86 (51)                           | 83 (49)                        |
| Age, mean (SD)       | 49.5 (3.1)                        | 52.0 (2.5)                     |
